# Supplementary material
Source: publisher site journal article supplement (https://www.kjim.org/upload/media/kjim-2023-350-Supplementary-Table-4.pdf)
Supplement: Supplementary file 1 [file kjim-2023-350-Supplementary-Table-4.pdf]

Supplementary Table 4. Incidence of AE in total patients

| Category                                        | Week 0–12 |         | Week 12–24     |             | Week 0–24                    |                            |
|-------------------------------------------------|-----------|---------|----------------|-------------|------------------------------|----------------------------|
|                                                 | KRG       | Placebo | Continuous-KRG | Placebo-KRG | Continuous-KRG <sup>a)</sup> | Placebo -KRG <sup>b)</sup> |
| Total number of patients                        | 1         | 3       | 8              | 4           | 9                            | 7                          |
| Total number of AEs                             | 1         | 3       | 8              | 5           | 9                            | 8                          |
| Skin and subcutaneous tissue                    | 1         | 0       | 1              | 1           | 2                            | 1                          |
| Infections and infestations                     | 0         | 0       | 1              | 4           | 1                            | 4 <sup>c)</sup>            |
| Musculoskeletal and connective tissue           | 0         | 2       | 1              | 0           | 1                            | 2                          |
| Injury, poisoning, and procedural complications | 0         | 0       | 1              | 0           | 1                            | 0                          |
| Neoplasms benign, malignant, and unspecified    | 0         | 1       | 2              | 0           | 2                            | 1                          |
| Investigations                                  | 0         | 0       | 1              | 0           | 1                            | 0                          |
| Gastrointestinal disorders                      | 0         | 0       | 1              | 0           | 1                            | 0                          |

AE, adverse event; KRG, Korean Red Ginseng.

<sup>a)</sup>Nine patients in the KRG group reported an AE during the entire study period; two skin manifestations (pruritus and urticaria), two neoplasms (colon poly and breast mass), one herpes zoster, arthralgia, ligament rupture on a knee, liver function abnormality, and enteritis.

<sup>b)</sup>Seven patients in the placebo group experienced eight AEs during the entire study period: four infections or infestations by three patients (lymphadenopathy, herpes zoster, cystitis, and common cold), two arthralgias, one Henoch-Schönlein purpura, and one benign lung nodule.

<sup>c)</sup>One patient reported two infections (cystitis and common cold) at different times.
